# Supplementary material
Source: PubMed Central journal article supplement (PMC3273045)
Supplement: NIHMS352942-supplement-1.pdf [file NIHMS352942-supplement-1.pdf]

**Supplemental Table 1: Characteristics of ethanol- and pair-fed wild-type and**

***Clqa*<sup>-/-</sup> mice.** Pair-fed n=4, ethanol-fed n=6. No statistical differences were found between genotypes,  $p>0.05$ .

**Supplemental Figure 1: TUNEL-positive cells in mouse livers after short-term ethanol**

**feeding.** Wild-type mice were allowed free access to ethanol-containing diets (4d/11% ethanol) or pair-fed control diets. TUNEL-positive nuclei were visualized by immunohistochemistry in formalin-fixed liver sections with peroxidase labelling. Slides were counterstained with hematoxylin. Images are representative of at least 3 mice per group. Areas in the red boxes are enlarged. Red arrows point to cells with macrophage-like morphology that are TUNEL-positive and white arrows point to cells with macrophage-like morphology that are TUNEL-negative.

|                                            | Wild-type                        |             | C1qa <sup>-/-</sup> |             |
|--------------------------------------------|----------------------------------|-------------|---------------------|-------------|
|                                            | Pair-fed                         | EtOH-fed    | Pair-fed            | EtOH-fed    |
|                                            | <b>Short-term (4d/11%)</b>       |             |                     |             |
| <b>Body weight (g)</b>                     |                                  |             |                     |             |
| Initial                                    | 18.8 ± 0.6                       | 18.6 ± 0.3  | 17.5 ± 1.1          | 19.3 ± 0.5  |
| Final                                      | 20.5 ± 0.3                       | 20.7 ± 0.7  | 18.9 ± 0.8          | 20.6 ± 0.8  |
| <b>Average daily food intake (ml/cage)</b> | Pair-fed                         | 29.5 ± 1.4  | Pair-fed            | 27.0 ± 2.9  |
|                                            | <b>Chronic ethanol (25d/32%)</b> |             |                     |             |
| <b>Body weight (g)</b>                     |                                  |             |                     |             |
| Initial                                    | 17.6 ± 0.3                       | 18.6 ± 0.6  | 16.7 ± 0.5          | 17.5 ± 0.5  |
| Final                                      | 22.5 ± 1.2                       | 22.4 ± 1.1  | 21.4 ± 0.5          | 20.1 ± 0.6  |
| <b>Average daily food intake (ml/cage)</b> | Pair-fed                         | 18.9 ± 0.5  | Pair-fed            | 18.9 ± 1.0  |
|                                            | <b>Acute Gavage</b>              |             |                     |             |
| <b>Plasma EtOH (mM)</b>                    | nd                               | 104.7 ± 5.1 | nd                  | 99.0 ± 12.3 |

Supplemental Figure 1

Pair-fed

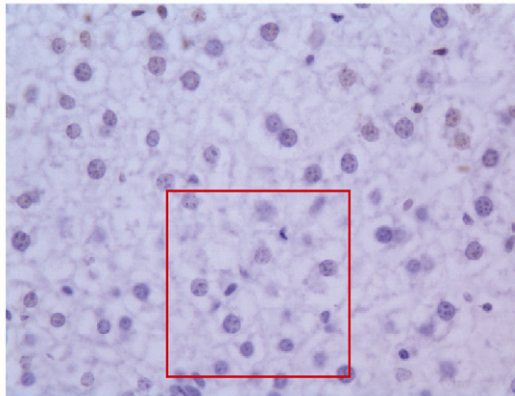

EtOH-fed (4d/11%)

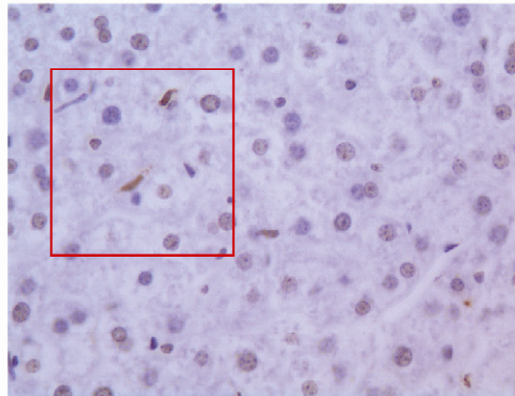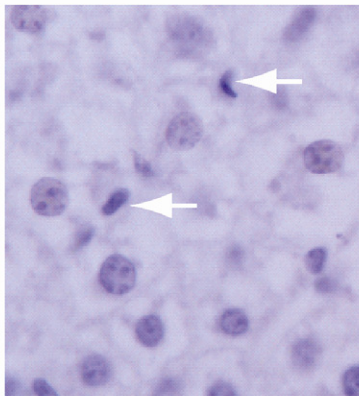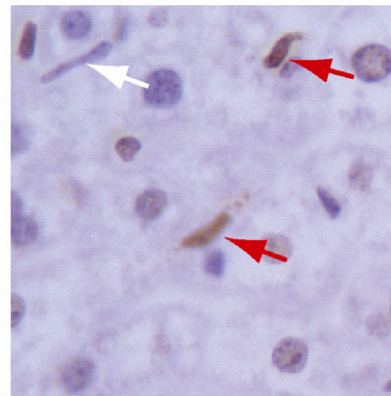

ACQ
